# Supplementary material
Source: PubMed Central journal article supplement (PMC8729779)
Supplement: joces-135-258964-s1.pdf [file joces-135-258964-s1.pdf]

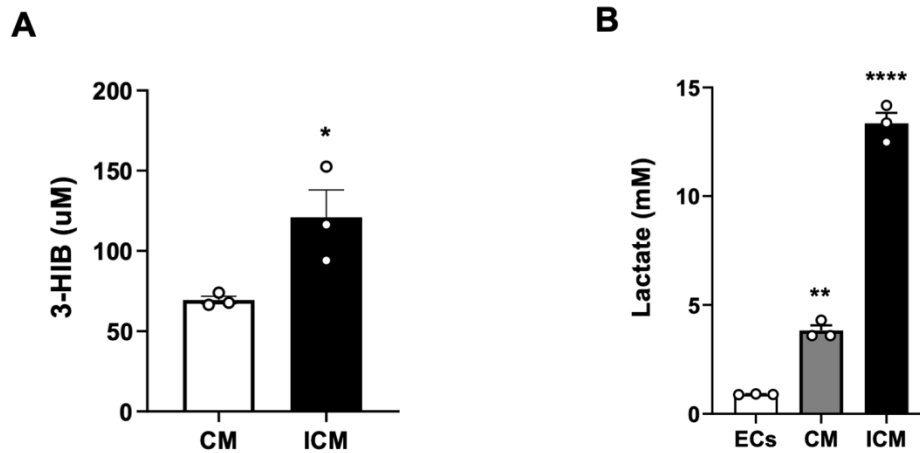

**Fig. S1. Lactate signaling dominates the paracrine activity between adipocytes and endothelial cells.**

(A) GC-MS measurements depicting the concentration of 3-HIB secreted from adipocytes in CM and ICM.

(B) YSI measurements depicting the concentration of lactate secreted from endothelial cells (ECs) and adipocytes (CM, ICM).

Data are means and error bars are  $\pm$  SEM. N= 3 biological replicates for every condition in A and B. Each experiment was replicated at least twice. Statistics were determined using one-way ANOVA with Dunnett's test for multiple comparisons. In A \* $p < 0.05$  (ICM compared to CM). In B, \*\* $p < 0.01$ , \*\*\*\* $p < 0.0001$  (all compared to ECs).
